# Supplementary material
Source: PubMed Central journal article supplement (PMC3383597)
Supplement: cc-11-2391-s01.pdf [file cc-11-2391-s01.pdf]

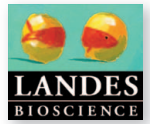

## **Supplemental Material to:**

**Marina Kolesnichenko, Lixin Hong, Rong Liao,  
Peter K. Vogt and Peiqing Sun**

**Attenuation of TORC1 signaling delays replicative and  
oncogenic ras-induced senescence**

**2012; 11(11)**

**<http://dx.doi.org/10.4161/cc.20683>**

**<http://www.landesbioscience.com/journals/cc/article/20683>**

1S.

Replicative

RAS-induced senescence

Rapamycin (nM) - - - - 10 10  
PP242 (nM) - - 200 200 - -

- - - - 10 10  
- - 200 200 - -

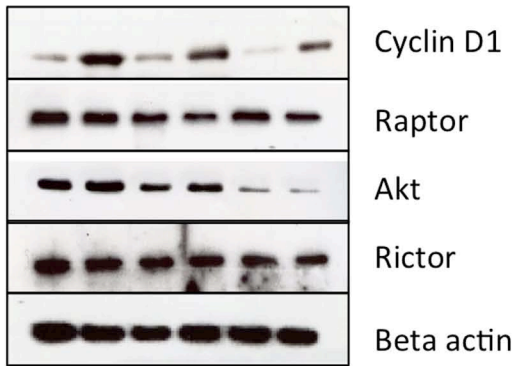

senescent

- + - + - +

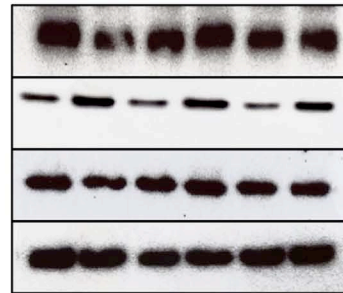

- + - + - +

2S. -FBS  
 Rapamycin (nM) 0 0 5 50 250 1000

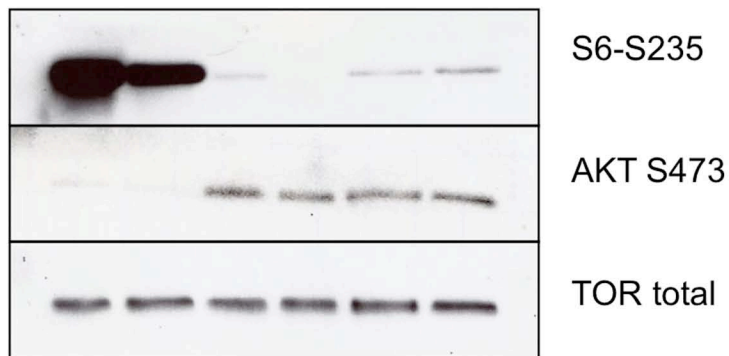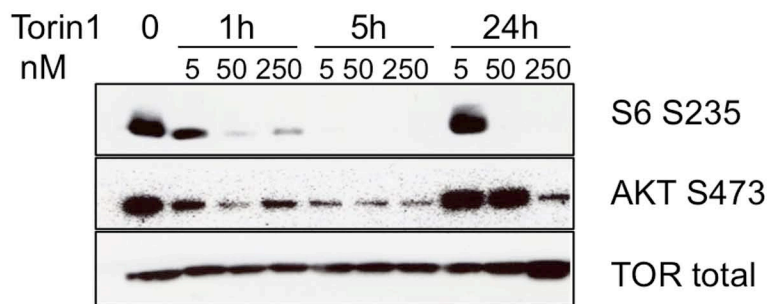

Torin1 (5nM) 0 5 10 15 20 24  
 Every 5h

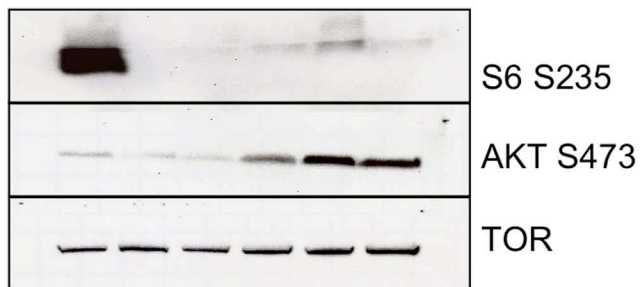

Inhibitor INK128

h 0 1 5 24  
 nM 0 1 10 1 10 1 10

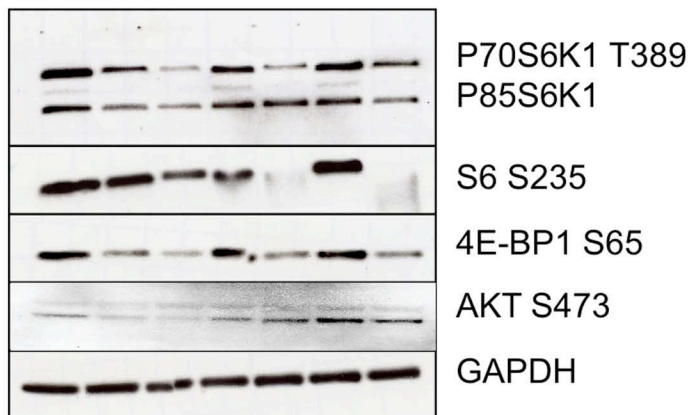

**Figure S1. Treatment with rapamycin or PP242 results in downregulation of some eIF4E dependent and independent proteins.** SDS-PAGE Western blot of BJ cells treated with 10 nM rapamycin or ATP competitive inhibitor PP242 200 nM for 3 days.

**Figure S2. Long-term inhibition of TORC2 results in rephosphorylation of AKT S473** Top panel: SDS-PAGE Western blot of BJ cells treated with 0 – 1000 nM rapamycin overnight. FBS: no serum. Middle panel: SDS-PAGE Western blot of cells treated with 0, 5, 50 or 250 nM Torin1 once for either 5 or 24 hours. Lower panel: SDS-PAGE Western blot of cells treated with 5 nM Torin1 (left panel) every 5 hours with complete change of media for 24 hours or with inhibitor INK128 1 nM or 10 nM for 24 hours (right panel).
